# Supplementary material for: Probing hypoxia-induced staurosporine resistance in prostate cancer cells with a microfluidic culture system
Source: Royal Society of Chemistry journal article supplement (doi:10.1039/c3an02324a), 2014-01-01
Supplement: c3an02324a.pdf [file c3an02324a.pdf]

*Electronic Supplementary Information*

Probing Hypoxia-Induced Staurosporine Resistance in Prostate Cancer Cells with a Microfluidic  
Culture System

Grishma Khanal, Scott Hiemstra and Dimitri Pappas\*

Department of Chemistry and Biochemistry

Texas Tech University, Lubbock, TX 79409-1061

d.pappas@ttu.edu

\*Corresponding Author

Table E1: Chip Dimension

| Chip Features                           | Dimensions |
|-----------------------------------------|------------|
| Length of main channel                  | 5.5 cm     |
| Width of main channel                   | 300 μm     |
| Length of culture chamber               | 1 mm       |
| Width of culture chamber                | 150 μm     |
| Length of vacuum channels               | 4.8 cm     |
| Width of vacuum channels                | 150 μm     |
| Height of all channels                  | 38 μm      |
| Number of culture chambers on each side | 128        |
